# Supplementary material for: Pirtobrutinib results in reversible platelet dysfunction compared to ibrutinib and acalabrutinib
Source: PubMed Central journal article supplement — Haematologica. 2022 Dec 15;108(5):1429–35. doi: 10.3324/haematol.2022.281402 (PMC10153540; doi:10.3324/haematol.2022.281402), 2022-12-15
Supplement: 2022_281402_BYE_SUPPL.pdf [file 2022_281402_BYE_SUPPL.pdf]

# Pirtobrutinib results in reversible platelet dysfunction compared to ibrutinib and acalabrutinib

Alexander P. Bye,<sup>1,2</sup> Neline Kriek,<sup>2</sup> Tanya Sage,<sup>2</sup> Suzannah J. Rawlings,<sup>2</sup> Catherine Prodger,<sup>3</sup> Murali Kesavan,<sup>3</sup> Charlotte Lees,<sup>3</sup> Stephen Booth,<sup>4</sup> Louise G Cowen,<sup>5</sup> Kirsty Shefferd,<sup>5</sup> Michael J. Desborough,<sup>6</sup> Jonathan M. Gibbins<sup>2#</sup> and Toby A. Eyre<sup>3#</sup>

<sup>1</sup>Molecular and Clinical Sciences Research Institute, St George's University, Cranmer Terrace, London; <sup>2</sup>Institute for Cardiovascular and Metabolic Research, School of Biological Sciences, University of Reading, Reading; <sup>3</sup>Department of Clinical Hematology, Cancer and Hematology Center, Churchill Hospital, Oxford University Hospitals NHS Foundation Trust, Oxford; <sup>4</sup>Department of Clinical Hematology, Royal Berkshire Hospital NHS Foundation Trust, Reading; <sup>5</sup>Hematology Late Phase Clinical Trial Unit, Oxford University Hospitals NHS Foundation Trust, Oxford and <sup>6</sup>Department of Clinical Hematology, Oxford University Hospitals NHS Foundation Trust, Oxford, UK

*#JMG and TAE contributed equally as co-senior authors.*

Correspondence:

A.P. BYE - a.bye@sgul.ac.uk

<https://doi.org/10.3324/haematol.2022.281402>

## Supplementary Figure 1

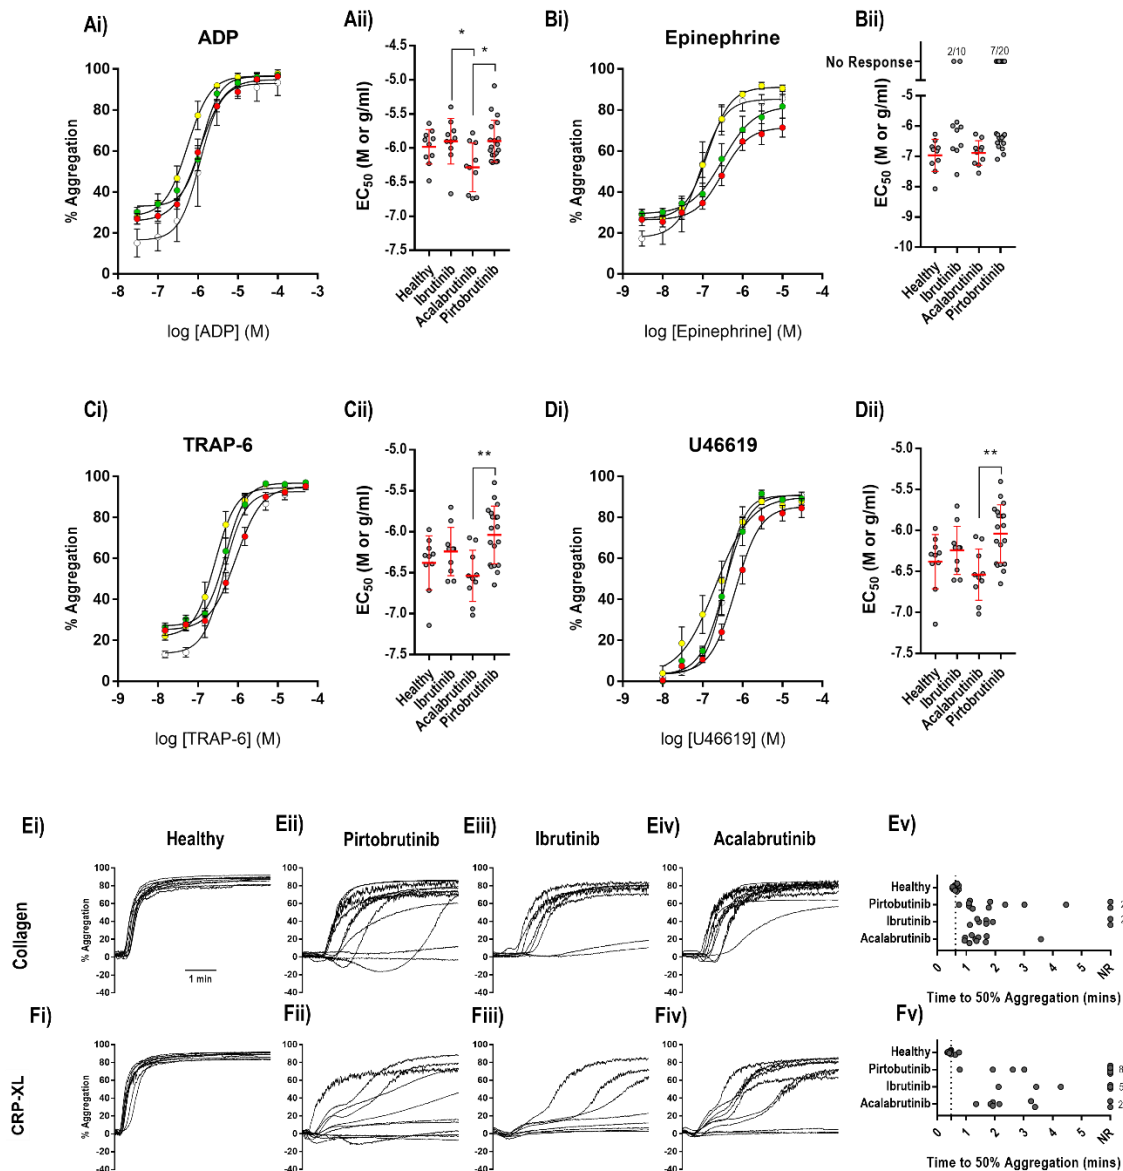

**Supplementary Figure 1. Pirtobrutinib, ibrutinib and acalabrutinib therapy causes platelet dysfunction downstream of GPVI.** Aggregation of PRP from healthy donors or patients receiving BTKi therapy measured in 96-well plates following stimulation with concentration ranges of A) ADP, B) epinephrine, C) TRAP-6 and D) U46619. Plots of i) concentration-response curves for each agonist in which points represent the mean response to each concentration  $\pm$  s.e.m. and ii) scatter plots of EC<sub>50</sub> values, bars represent the mean  $\pm$  S.D. Failure to induce concentration-dependent aggregation was designated 'No Response'. The proportion of non-responders is noted at the top of relevant scatter plots. Statistical comparisons were performed by two-way ANOVA with Tukey multiple comparisons test. \* p

< 0.05, \*\*  $p < 0.01$ . Aggregation measured by Born aggregometry stimulated by E) 10 $\mu$ g/ml Collagen or F) 3 $\mu$ g/ml CRP-XL of PRP samples taken from i) healthy donors or patients receiving ii) pirtobrutinib, iii) ibrutinib or iv) acalabrutinib. Scatter plots of v) time taken to achieve 50% aggregation. The dotted line represents the mean time to 50% aggregation of healthy donors stimulated with each agonist. Failure to achieve 50% aggregation within 5 minutes was designated 'not reached' (NR). The proportion of responses that did not reach 50% aggregation is noted to the right of the graphs.

# Supplementary Figure 2

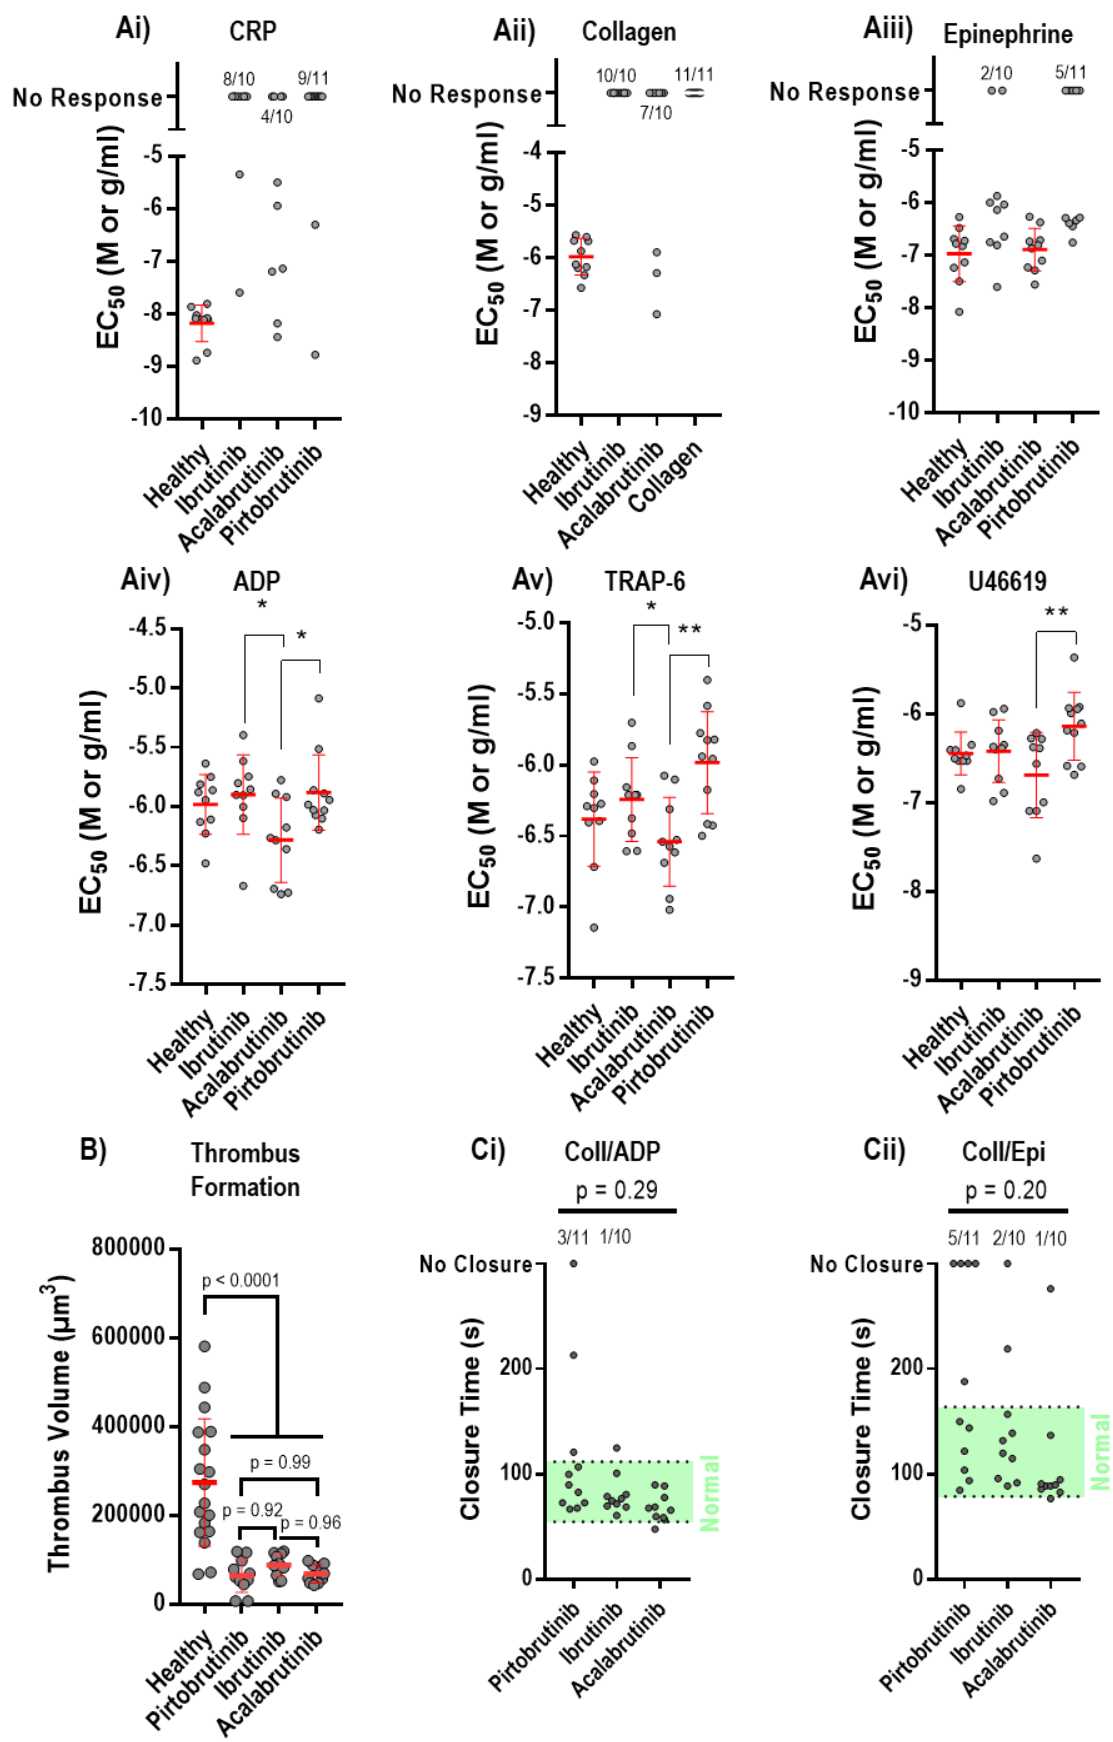

**Supplementary Figure 2. Platelet function parameters for patients with CLL only.** A) Scatter plots of the EC<sub>50</sub> of PBA responses of patients with CLL receiving BTKi to i) CRP-XL, ii) collagen, iii) ADP, iv) epinephrine, v) TRAP-6 and vi) U46619. Bars represent the mean EC<sub>50</sub> ± S.D. The p-values were calculated by t-test to compare mean EC<sub>50</sub>. B) A scatter plot of thrombus volumes formed in collagen-coated microfluidic chambers. Bars represent the mean volume ± S.D. and the p-value was calculated by 1-way ANOVA. Scatter plots of PFA-200 closure times measured using Ci) collagen/ADP and Cii) collagen/ADP cartridges grouped by duration of BTKi therapy including the normal CT range (green) and proportion of abnormal CT (top of graph). The p-values were calculated using Fisher's Exact Test to compare the proportion of prolonged CTs in the groups.

## Supplementary Figure 3

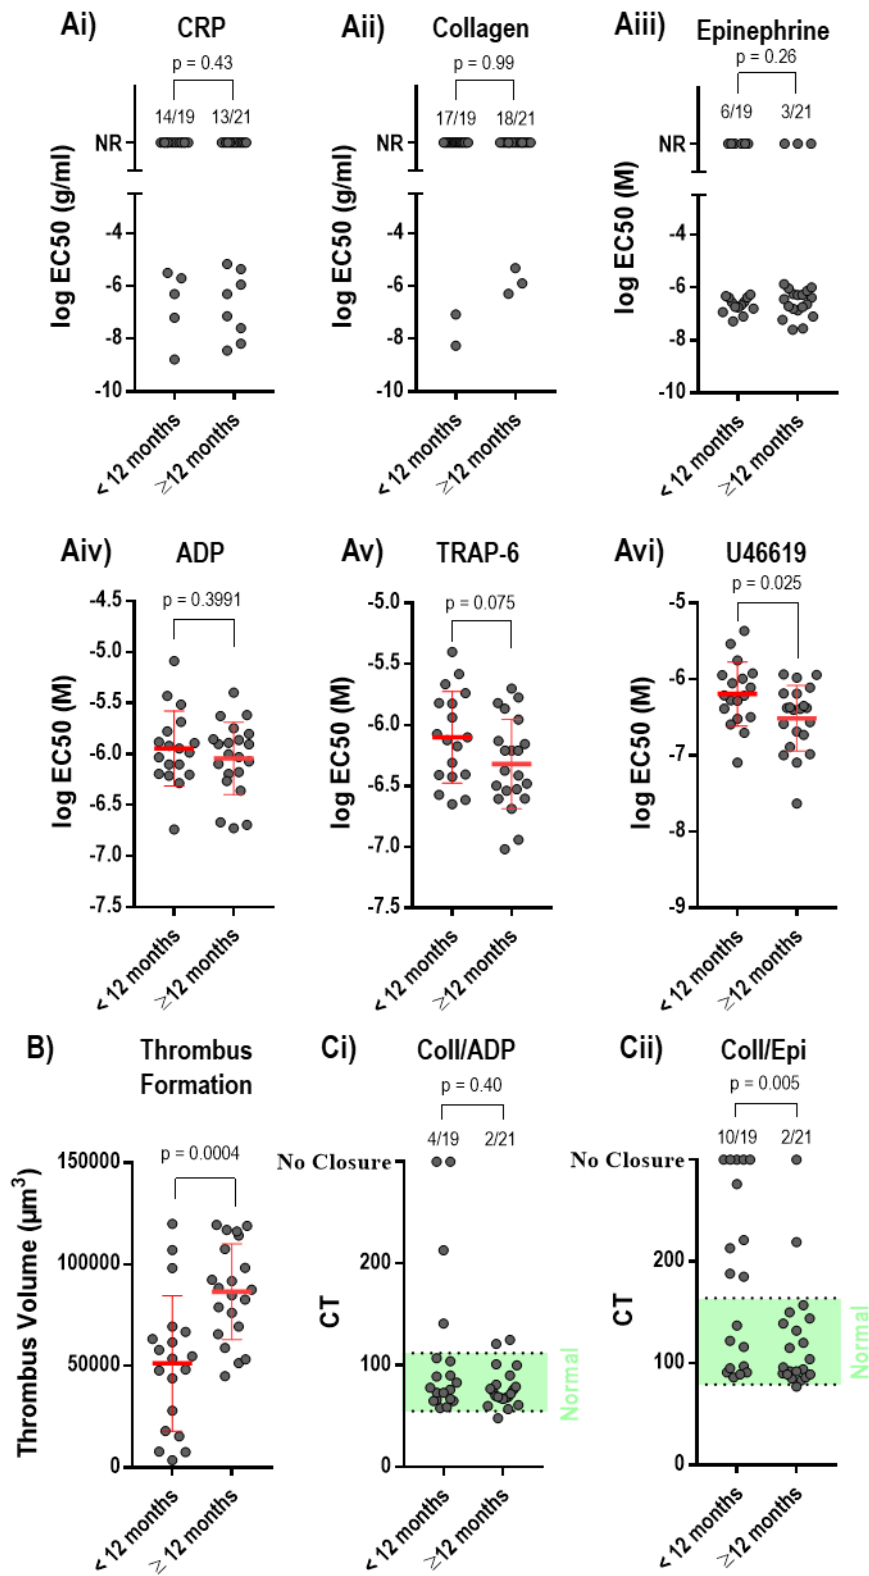

**Supplementary Figure 3. Duration of BTKi therapy is a stronger determinant of whole blood haemostasis parameters than pathway-specific platelet function measured by aggregometry.** A) Scatter plots of the EC<sub>50</sub> of PBA responses of patients receiving BTKi to i) CRP-XL, ii) collagen, iii) ADP, iv) epinephrine, v) TRAP-6 and vi) U46619 by duration of BTKi therapy. Bars represent the mean EC<sub>50</sub> ± S.D. The p-values were calculated by t-test to compare mean EC<sub>50</sub> or by chi-square to compare proportions of non-responders (NR) as appropriate. B) A scatter plot of thrombus volumes formed in collagen-coated microfluidic chambers compared by duration of BTKi therapy. Bars represent the mean volume ± S.D. and the p-value was calculated by t-test. Scatter plots of PFA-200 closure times measured using Ci) collagen/ADP and Cii) collagen/ADP cartridges grouped by duration of BTKi therapy including the normal CT range (green) and proportion of abnormal CT (top of graph). The p-values were calculated using Chi-square analysis to compare the proportion of prolonged CTs in the groups.
